# Supplementary material for: Coexistence of magnetic ordering and ferroelectricity in a Dy-nitronyl nitroxide chain
Source: Royal Society of Chemistry journal article supplement (doi:10.1039/d4tc01384k), 2024-01-01
Supplement: d4tc01384k1.pdf [file d4tc01384k1.pdf]

## Supporting Information

### **Coexistence of magnetic ordering and ferroelectricity in a Dy-nitronyl nitroxide chain**

Xiaotong Wang,<sup>a</sup> Meiyang Liu,<sup>b</sup> Yuxia Wang,<sup>a</sup> Chaoyi Jin,<sup>a</sup> Hongwei Song,<sup>a</sup> Zhiliang Liu,<sup>\*b</sup> Jinkui Tang,<sup>\*c</sup> Licun Li<sup>\*a</sup>

*<sup>a</sup> Department of Chemistry, Key Laboratory of Advanced Energy Materials Chemistry, College of Chemistry, Nankai University, Tianjin 300071, China*

*<sup>b</sup> Inner Mongolia Key Laboratory of Chemistry and Physics of Rare Earth Materials, School of Chemistry and Chemical Engineering, Inner Mongolia University, Hohhot 010021, P.R. China*

*<sup>c</sup> State Key Laboratory of Rare Earth Resource Utilization, Changchun Institute of Applied Chemistry, Chinese Academy of Sciences, Changchun, 130022 China*

**Table S1.** Crystallographic Data and Structure Refinement for **1**

| Complex                                                                     | <b>1</b>                                                                        |
|-----------------------------------------------------------------------------|---------------------------------------------------------------------------------|
| Empirical formula                                                           | C <sub>30</sub> H <sub>24</sub> F <sub>18</sub> DyN <sub>2</sub> O <sub>9</sub> |
| Mr                                                                          | 1061.01                                                                         |
| <i>T</i> , (K)                                                              | 113                                                                             |
| Crystal system                                                              | Monoclinic                                                                      |
| Space group                                                                 | <i>P2</i> <sub>1</sub>                                                          |
| <i>a</i> /Å                                                                 | 22.297(2)                                                                       |
| <i>b</i> /Å                                                                 | 16.6711(16)                                                                     |
| <i>c</i> /Å                                                                 | 23.000(2)                                                                       |
| <i>α</i> /°                                                                 | 90                                                                              |
| <i>β</i> /°                                                                 | 116.697(2)                                                                      |
| <i>γ</i> /°                                                                 | 90                                                                              |
| <i>V</i> /Å <sup>3</sup>                                                    | 7638.0(12)                                                                      |
| <i>Z</i>                                                                    | 8                                                                               |
| <i>D</i> <sub>calcd</sub> /g·cm <sup>-3</sup>                               | 1.845                                                                           |
| <i>μ</i> /mm <sup>-1</sup>                                                  | 2.097                                                                           |
| <i>θ</i> /°                                                                 | 3.01 to 27.54                                                                   |
| <i>F</i> (000)                                                              | 4144                                                                            |
| Reflections collected                                                       | 98872 / 34384                                                                   |
| Unique reflns/ <i>R</i> <sub>int</sub>                                      | 0.0249                                                                          |
| GOF                                                                         | 1.047                                                                           |
| Flack parameter                                                             | 0.305(7)                                                                        |
| <i>R</i> <sub>1</sub> , <i>wR</i> <sub>2</sub> ( <i>I</i> > 2σ( <i>I</i> )) | <i>R</i> <sub>1</sub> =0.0385, <i>wR</i> <sub>2</sub> = 0.0964                  |
| <i>R</i> <sub>1</sub> , <i>wR</i> <sub>2</sub> (all data)                   | <i>R</i> <sub>1</sub> =0.0408, <i>wR</i> <sub>2</sub> = 0.0979                  |

$$R_1 = \Sigma(|F_o| - |F_c|) / \Sigma|F_o|, wR_2 = [\Sigma w(|F_o|^2 - |F_c|^2)^2 / \Sigma w(|F_o|^2)^2]^{1/2}$$

**Table S2.** Selected bond distances (Å) and angles (°) for complex **1**.

| <i>Bond distances</i> |          |             |          |
|-----------------------|----------|-------------|----------|
| Dy(1)-O(1)            | 2.373(6) | Dy(1)-O(2)  | 2.337(6) |
| Dy(1)-O(3)            | 2.317(6) | Dy(1)-O(4)  | 2.381(7) |
| Dy(1)-O(5)            | 2.337(6) | Dy(1)-O(6)  | 2.332(5) |
| Dy(1)-O(8)            | 2.381(6) | Dy(1)-O(9)  | 2.337(6) |
| O(8)-N(1)             | 1.294(8) | O(9)-N(2)   | 1.300(9) |
| Dy(2)-O(17)           | 2.368(5) | Dy(2)-O(10) | 2.357(5) |
| Dy(2)-O(11)           | 2.333(5) | Dy(2)-O(18) | 2.323(5) |
| Dy(2)-O(14)           | 2.390(5) | Dy(2)-O(12) | 2.318(5) |
| Dy(2)-O(15)           | 2.327(5) | Dy(2)-O(13) | 2.383(5) |

|                   |            |                   |            |
|-------------------|------------|-------------------|------------|
| O(17)-N(3)        | 1.271(8)   | O(18)-N(4)        | 1.296(8)   |
| Dy(3)-O(27)       | 2.353(5)   | Dy(3)-O(23)       | 2.340(5)   |
| Dy(3)-O(24)       | 2.360(5)   | Dy(3)-O(19)       | 2.378(5)   |
| Dy(3)-O(20)       | 2.325(5)   | Dy(3)-O(22)       | 2.330(5)   |
| Dy(3)-O(21)       | 2.377(5)   | Dy(3)-O(26)       | 2.321(5)   |
| O(27)-N(6)        | 1.286(8)   | O(26)-N(5)        | 1.275(8)   |
| Dy(4)-O(35)       | 2.373(5)   | Dy(4)-O(32)       | 2.355(5)   |
| Dy(4)-O(33)       | 2.324(5)   | Dy(4)-O(31)       | 2.342(5)   |
| Dy(4)-O(28)       | 2.333(5)   | Dy(4)-O(29)       | 2.357(6)   |
| Dy(4)-O(30)       | 2.351(5)   | Dy(4)-O(36)       | 2.334(5)   |
| <i>Angles</i>     |            |                   |            |
| O(9)-Dy(1)-O(1)   | 73.7(2)    | O(9)-Dy(1)-O(2)   | 74.5(2)    |
| O(9)-Dy(1)-O(3)   | 101.7(2)   | O(9)-Dy(1)-O(4)   | 73.1(2)    |
| O(9)-Dy(1)-O(5)   | 145.3(2)   | O(9)-Dy(1)-O(6)   | 86.1(2)    |
| O(9)-Dy(1)-O(8)   | 142.1(2)   | O(8)-Dy(1)-O(1)   | 71.11(2)   |
| O(2)-Dy(1)-O(8)   | 82.0(2)    | O(3)-Dy(1)-O(8)   | 84.7(2)    |
| O(8)-Dy(1)-O(4)   | 142.5(2)   | O(5)-Dy(1)-O(8)   | 72.6(2)    |
| O(6)-Dy(1)-O(8)   | 112.9(2)   | N(2)-O(9)-Dy(1)   | 153.3(6)   |
| N(1)-O(8)-Dy(1)   | 138.6(5)   | O(18)-Dy(2)-O(17) | 140.09(17) |
| O(18)-Dy(2)-O(10) | 74.56(18)  | O(18)-Dy(2)-O(11) | 73.14(19)  |
| O(18)-Dy(2)-O(14) | 145.51(17) | O(18)-Dy(2)-O(15) | 97.15(18)  |
| O(18)-Dy(2)-O(13) | 71.12(18)  | O(12)-Dy(2)-O(17) | 94.05(17)  |
| O(10)-Dy(2)-O(17) | 70.63(18)  | O(11)-Dy(2)-O(17) | 78.78(18)  |
| O(15)-Dy(2)-O(17) | 101.28(18) | N(4)-O(18)-Dy(2)  | 145.8(4)   |
| N(3)-O(17)-Dy(2)  | 134.6(4)   | O(27)-Dy(3)-O(24) | 75.50(18)  |
| O(27)-Dy(3)-O(21) | 69.34(17)  | O(23)-Dy(3)-O(24) | 72.88(18)  |
| O(23)-Dy(3)-O(21) | 144.59(18) | O(20)-Dy(3)-O(27) | 92.82(19)  |
| O(20)-Dy(3)-O(23) | 140.26(19) | O(20)-Dy(3)-O(19) | 72.79(19)  |
| O(22)-Dy(3)-O(23) | 70.90(18)  | O(22)-Dy(3)-O(24) | 126.0(2)   |
| O(21)-Dy(3)-O(19) | 129.71(19) | O(26)-Dy(3)-O(23) | 93.1(2)    |
| N(6)-O(27)-Dy(3)  | 134.7(5)   | N(5)-O(26)-Dy(3)  | 150.0(5)   |
| O(32)-Dy(4)-O(35) | 71.13(18)  | O(32)-Dy(4)-O(29) | 133.38(18) |
| O(33)-Dy(4)-O(32) | 74.15(18)  | O(33)-Dy(4)-O(30) | 131.16(19) |
| O(33)-Dy(4)-O(36) | 73.1(2)    | O(31)-Dy(4)-O(35) | 91.77(17)  |
| O(31)-Dy(4)-O(29) | 76.90(19)  | O(28)-Dy(4)-O(35) | 104.23(18) |
| O(28)-Dy(4)-O(29) | 72.71(19)  | O(30)-Dy(4)-O(32) | 126.57(19) |
| N(7)-O(35)-Dy(4)  | 134.3(4)   | N(8)-O(36)-Dy(4)  | 154.2(5)   |

**Table S3.** SHAPE analysis for the complex **1**.

| Complex    | SAPR-8 | TDD-8        | JBTPR-8 | BTPR-8 | JSD-8 |
|------------|--------|--------------|---------|--------|-------|
| <b>Dy1</b> | 1.158  | <b>1.055</b> | 1.854   | 1.289  | 3.581 |
| <b>Dy2</b> | 2.810  | <b>0.117</b> | 3.000   | 2.378  | 2.780 |
| <b>Dy3</b> | 2.045  | <b>0.211</b> | 2.407   | 1.857  | 2.877 |
| <b>Dy4</b> | 1.594  | <b>0.260</b> | 2.582   | 1.939  | 3.123 |

(SAPR-8: square antiprism. TDD-8: triangular dodecahedron. JBTPR-8: biaugmented trigonal prism J50. BTPR-8: biaugmented trigonal prism. JSD-8: snub diphenoid J84.)

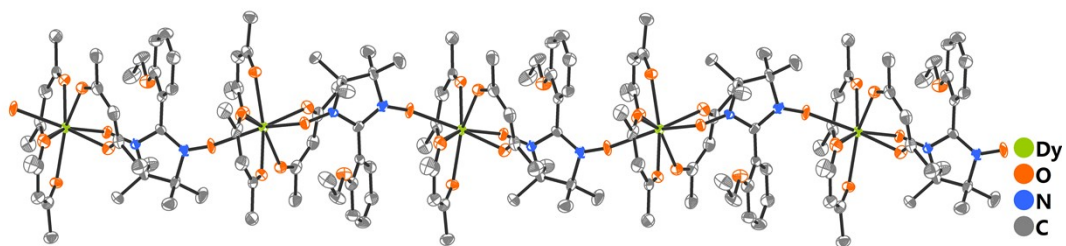

**Figure S1.** The ORTEP-style diagram of complex **1** with thermal ellipsoids at 30% probability, H and F atoms are not shown for the sake of clarity.

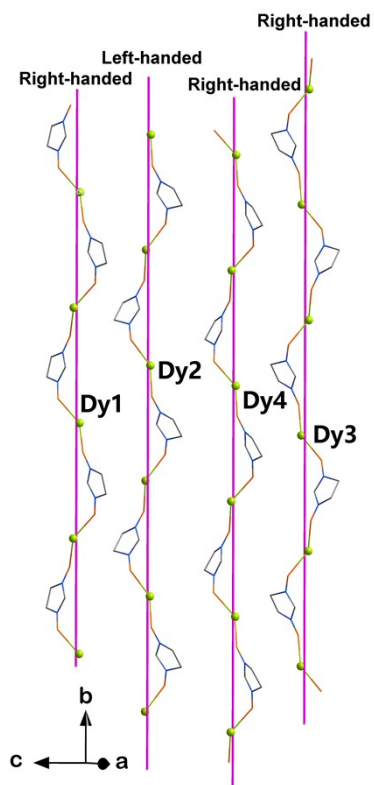

**Figure S2.** Four helical chains in the crystal lattice along the *b* axis (Some atoms are omitted for clarity).

**Figure S3.** Coordination polyhedrons of the Dy<sup>III</sup> ions in complex **1**.

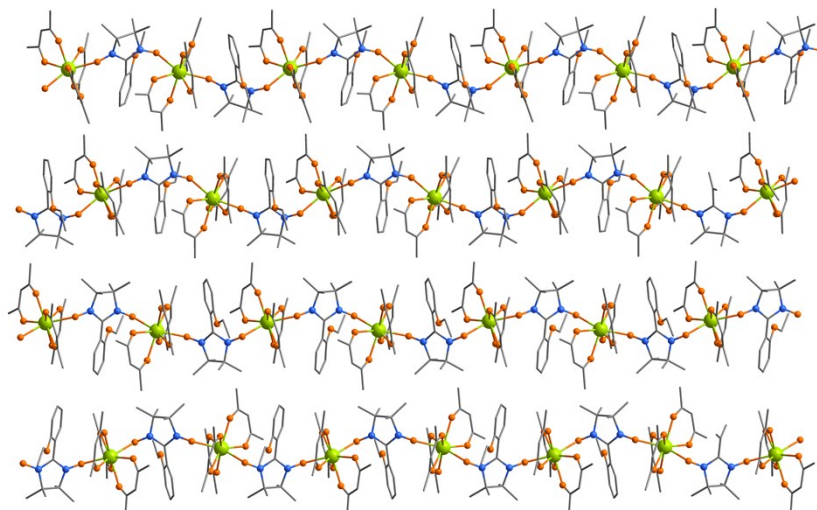

**Figure S4.** Packing diagram of complex **1**, H and F atoms are not shown for the sake of clarity.

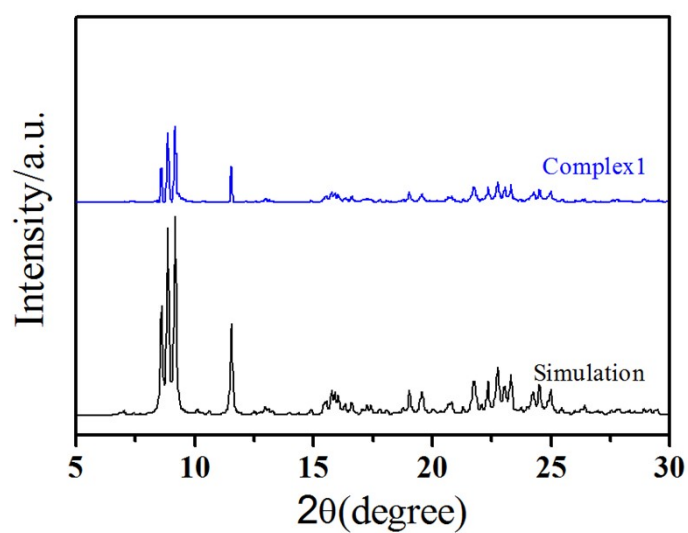

**Figure S5.** Powder X-ray diffraction patterns (PXRD) of **1**.

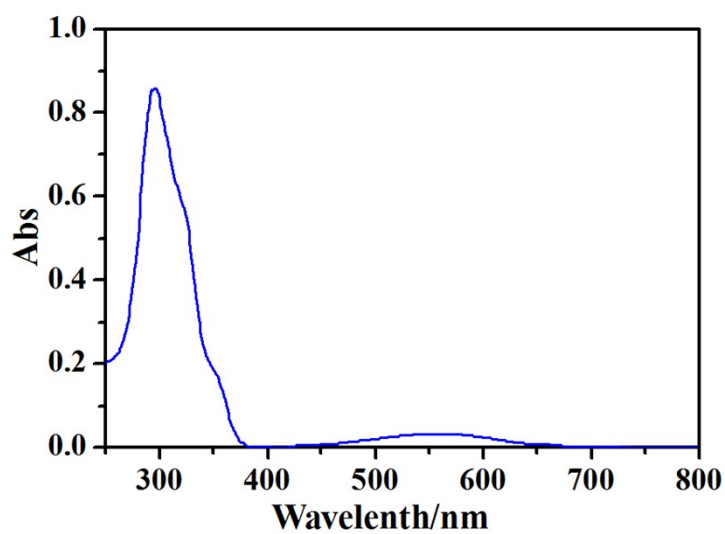

**Figure S6.** UV-vis spectra of complex **1** ( $1.0 \times 10^{-5}$  M in  $\text{CH}_2\text{Cl}_2$ )

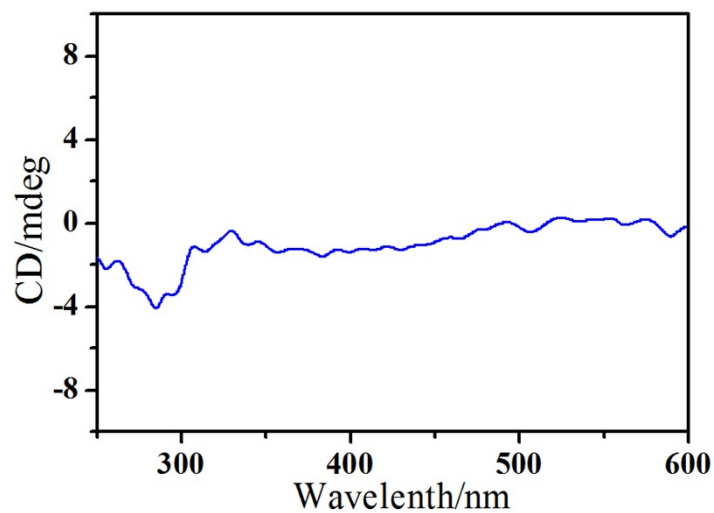

Figure S7. CD spectra of complex 1 in KBr pellet.

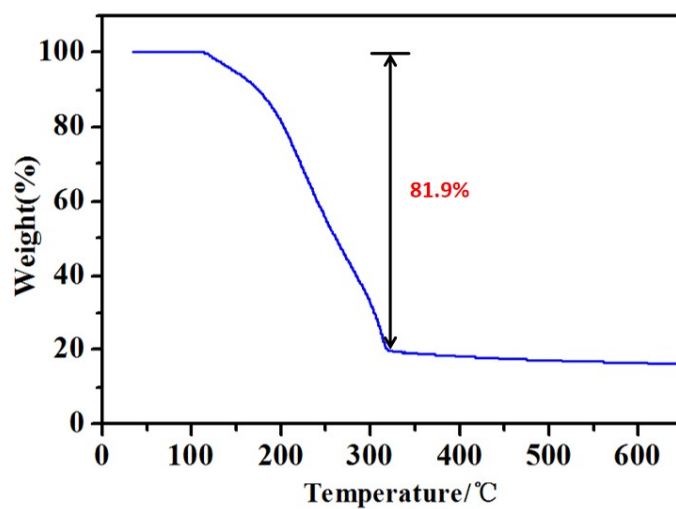

Figure S8. The TGA curve of complex 1.

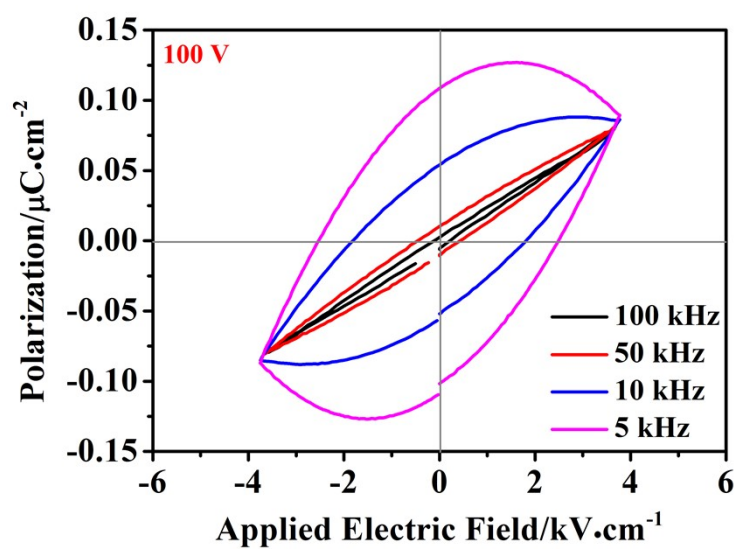

Figure S9. Frequency-dependent  $P$ - $E$  hysteresis loops of complex 1.

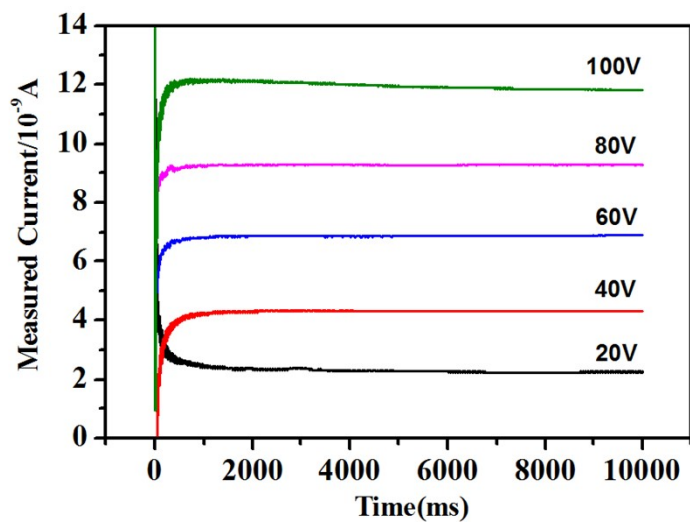

**Figure S10.** The leakage current of complex 1 when the voltage ranges from 20-100 V.

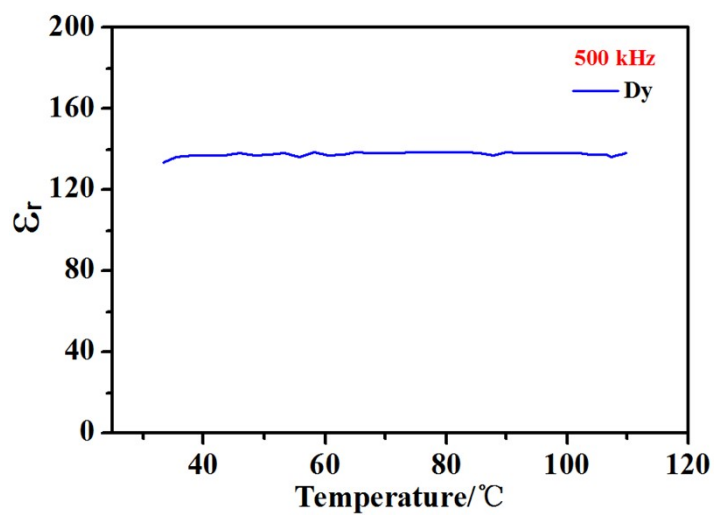

**Figure S11.** The dielectric constant of complex 1 at 500 kHz in the temperature range of 30-110  $^{\circ}\text{C}$ .

**Figure S12.** The DSC curves of complex 1.

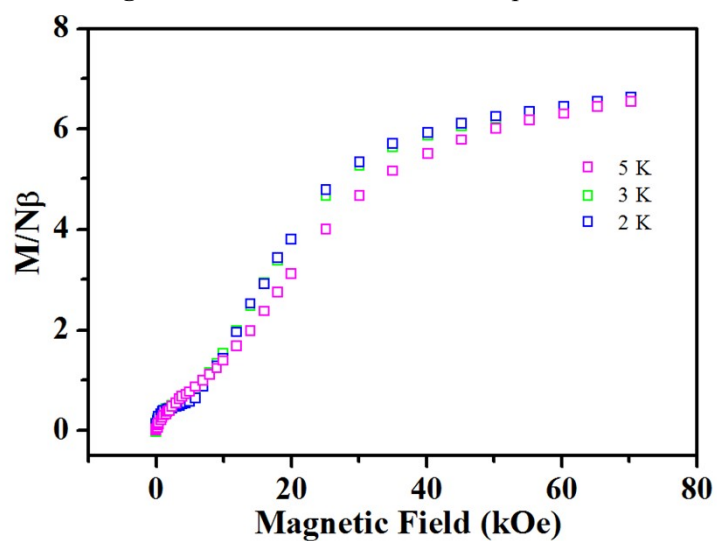

Figure S13.  $M$  vs  $H$  plots of **1** at 2-5 K.

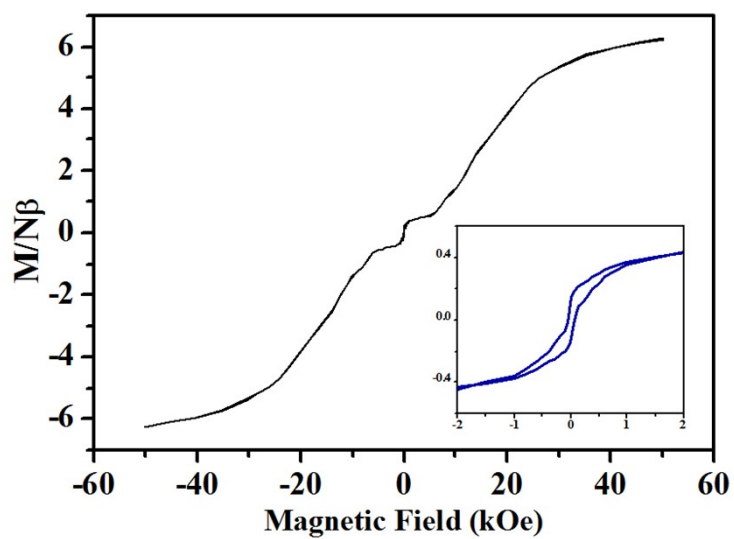

Figure S14. The hysteresis loop plot of **1** at 2 K.

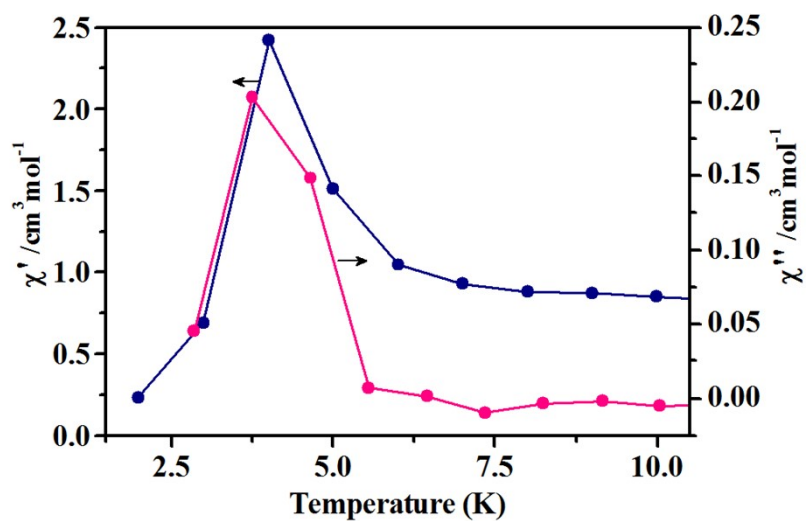

Figure S15. Measured  $\chi'$  and  $\chi''$  versus  $T$  plots under 170 dc field at the frequency of 997 Hz.



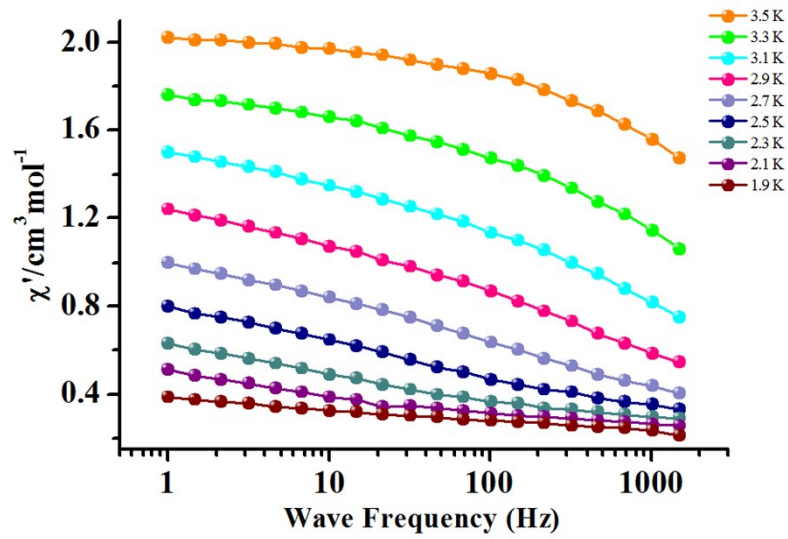

Figure S16. Frequency dependence of  $\chi'$  ac susceptibility under 170 Oe dc field for 1.

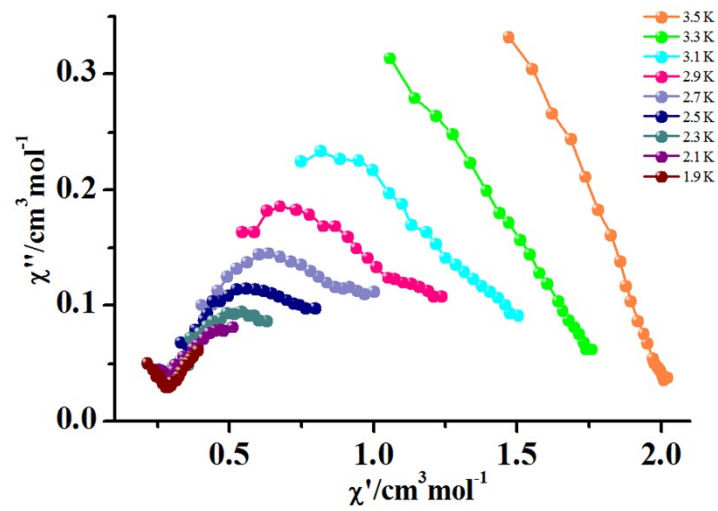

Figure S17. Cole-Cole plots for 1.
